# Supplementary material for: Evidence of Clostridium perfringens epsilon toxin associated with multiple sclerosis
Source: PubMed Central journal article supplement — Mult Scler. 2018 Apr 21;25(5):653–60. doi: 10.1177/1352458518767327 (PMC6439943; doi:10.1177/1352458518767327), 2018-04-21
Supplement: MSJ767327_supplementary_data.pdf [file MSJ767327_supplementary_data.pdf]

Table S1: Clinical features of patients with MS used in this study. RR = relapsing remitting, PP = primary progressive, SP = secondary progressive, CIS = clinically isolated syndrome and NA = data not available.

| Sample | Clinical Subtype | Date of diagnosis | Disease Duration from diagnosis | MRI Activity | Disease Modifying Therapy | High Dose steroids | ETX Result |
|--------|------------------|-------------------|---------------------------------|--------------|---------------------------|--------------------|------------|
| MS001  | RR               | NA                | 2 months                        | NA           | No                        | No                 | Negative   |
| MS002  | RR               | NA                | 5 years                         | NA           | No                        | No                 | Negative   |
| MS003  | RR               | NA                | 3 months                        | NA           | No                        | No                 | Negative   |
| MS004  | RR               | NA                | 4 years                         | NA           | No                        | No                 | Negative   |
| MS005  | RR               | NA                | 3 years                         | NA           | No                        | No                 | Negative   |
| MS006  | RR               | NA                | 5 months                        | NA           | Yes                       | No                 | Negative   |
| MS007  | RR               | NA                | 8 years                         | NA           | No                        | No                 | Negative   |
| MS008  | RR               | NA                | 7 years                         | NA           | Yes                       | No                 | Negative   |
| MS009  | RR               | NA                | 2 months                        | NA           | No                        | No                 | Negative   |
| MS010  | RR               | NA                | 4 years                         | NA           | No                        | No                 | Negative   |
| MS011  | RR               | NA                | 1 month                         | NA           | No                        | No                 | Positive   |
| MS012  | RR               | 2013              | 2009                            | NA           | No                        | NA                 | Negative   |
| MS013  | RR               | 2001              | 1998                            | NA           | Yes                       | NA                 | Negative   |
| MS014  | PP               | 2001              | 2001                            | NA           | Yes                       | NA                 | Negative   |
| MS015  | RR               | 2015              | 2011                            | NA           | No                        | NA                 | Negative   |
| MS016  | RR               | 2010              | 2005                            | NA           | Yes                       | NA                 | Negative   |
| MS017  | RR               | 2012              | 2011                            | NA           | Yes                       | NA                 | Positive   |
| MS018  | RR               | 2004              | 2004                            | NA           | No                        | NA                 | Negative   |
| MS019  | RR               | 2014              | 2006                            | NA           | Yes                       | NA                 | Negative   |
| MS020  | RR               | 2005              | 2004                            | NA           | No                        | NA                 | Negative   |
| MS021  | RR               | 2005              | 2003                            | NA           | Yes                       | NA                 | Positive   |
| MS022  | RR               | 2010              | 2010                            | NA           | Yes                       | NA                 | Positive   |
| MS023  | RR               | 2014              | 2004                            | NA           | Yes                       | NA                 | Negative   |
| MS024  | RR               | 2013              | 2013                            | NA           | Yes                       | NA                 | Positive   |
| MS025  | PP               | 2010              | NA                              | NA           | No                        | NA                 | Negative   |
| MS026  | SP               | 1976              | NA                              | NA           | Yes                       | NA                 | Positive   |
| MS027  | RR               | 2003              | NA                              | NA           | Yes                       | NA                 | Positive   |
| MS028  | SP               | 2000              | NA                              | NA           | No                        | NA                 | Positive   |
| MS029  | SP               | 1998              | NA                              | NA           | Yes                       | NA                 | Negative   |

|       |           |            |            |     |     |    |          |
|-------|-----------|------------|------------|-----|-----|----|----------|
| MS030 | PP        | 1997       | NA         | NA  | No  | NA | Negative |
| MS031 | SP        | 2001       | NA         | NA  | Yes | NA | Negative |
| MS032 | Not Known | NA         | NA         | NA  | No  | NA | Negative |
| MS033 | RR        | 2007       | NA         | NA  | No  | NA | Negative |
| MS034 | SP        | 1998       | NA         | NA  | NA  | NA | Negative |
| MS035 | SP        | 2000       | NA         | NA  | No  | NA | Negative |
| MS036 | PP        | 2009       | NA         | NA  | No  | NA | Negative |
| MS037 | SP        | 1989       | NA         | NA  | No  | NA | Negative |
| MS038 | RR        | 2009       | NA         | NA  | No  | NA | Negative |
| MS039 | SP        | 1976       | NA         | NA  | Yes | NA | Negative |
| MS040 | SP        | 1996       | NA         | NA  | No  | NA | Negative |
| MS041 | SP        | 1998       | NA         | NA  | Yes | NA | Negative |
| MS042 | RR        | 2001       | NA         | NA  | Yes | NA | Negative |
| MS043 | SP        | 1996       | NA         | NA  | No  | NA | Negative |
| MS044 | PP        | 2008       | NA         | NA  | No  | NA | Negative |
| MS045 | RR        | 2013       | NA         | NA  | No  | NA | Positive |
| MS046 | RR        | 15/11/2012 | NA         | Yes | Yes | No | Negative |
| MS047 | CIS       | NA         | 12/08/2015 | Yes | No  | No | Negative |
| MS048 | CIS       | NA         | 12/08/2015 | No  | No  | No | Positive |
| MS049 | CIS       | NA         | 2008       | No  | No  | No | Negative |
| MS050 | CIS       | NA         | 2014       | Yes | No  | No | Negative |
| MS051 | CIS       | NA         | 01/01/2012 | No  | No  | No | Negative |
| MS052 | CIS       | NA         | 15/04/2015 | Yes | No  | No | Negative |
| MS053 | CIS       | NA         | 15/02/2015 | Yes | No  | No | Positive |
| MS054 | CIS       | NA         | 1995       | No  | No  | No | Positive |
| MS055 | CIS       | NA         | 15/09/2015 | NA  | No  | No | Positive |
| MS056 | CIS       | NA         | 24/06/2014 | Yes | No  | No | Positive |
| MS057 | CIS       | NA         | 26/06/2015 | Yes | No  | No | Negative |
| MS058 | CIS       | NA         | 15/05/2015 | No  | No  | No | Negative |
| MS059 | CIS       | NA         | 2013       | Yes | No  | No | Negative |
| MS060 | CIS       | NA         | Jun-13     | Yes | No  | No | Negative |
| MS061 | CIS       | NA         | Oct-15     | No  | No  | No | Negative |

Table S2: Clinical features of patients with CIS used in this study. CIS = clinically isolated syndrome and NA = data not available.

| Sample   | Clinical Subtype | Disease Duration from diagnosis | MRI activity | Disease Modifying Therapy | High Dose steroids | ETX Result |
|----------|------------------|---------------------------------|--------------|---------------------------|--------------------|------------|
| CISMS001 | MS               | 12/08/2015                      | Yes          | No                        | No                 | Negative   |
| CISMS002 | MS               | 12/08/2015                      | No           | No                        | No                 | Positive   |
| CISMS003 | CIS              | 24/08/2015                      | Yes          | No                        | No                 | Negative   |
| CISMS004 | MS               | 2008                            | No           | No                        | No                 | Negative   |
| CISMS005 | MS               | 2014                            | Yes          | No                        | No                 | Negative   |
| CISMS006 | MS               | 01/01/2012                      | No           | No                        | No                 | Negative   |
| CISMS007 | MS               | 15/04/2015                      | Yes          | No                        | No                 | Negative   |
| CISMS008 | CIS              | 14/08/2015                      | Yes          | No                        | No                 | Negative   |
| CISMS009 | CIS              | 01/05/2014                      | Yes          | No                        | No                 | Negative   |
| CISMS010 | MS               | 15/02/2015                      | Yes          | No                        | No                 | Positive   |
| CISMS011 | MS               | 1995                            | No           | No                        | No                 | Positive   |
| CISMS012 | CIS              | 09/06/2015                      | Yes          | No                        | No                 | Positive   |
| CISMS013 | MS               | 15/09/2015                      | NA           | No                        | No                 | Positive   |
| CISMS014 | MS               | 24/06/2014                      | Yes          | No                        | No                 | Positive   |
| CISMS015 | CIS              | 2013                            | No           | No                        | No                 | Positive   |
| CISMS016 | MS               | 26/06/2015                      | Yes          | No                        | No                 | Negative   |
| CISMS017 | MS               | 15/05/2015                      | No           | No                        | No                 | Negative   |
| CISMS018 | MS               | 2013                            | Yes          | No                        | No                 | Negative   |
| CISMS019 | MS               | Jun-13                          | Yes          | No                        | No                 | Negative   |
| CISMS020 | MS               | Oct-15                          | No           | No                        | No                 | Negative   |

Table S3: Clinical features of patients with ON used in this study. NA = Data not available.

| Sample | Date of diagnosis | Date of first symptoms | MRI Activity | Disease Modifying Therapies | High dose steroids | ETX Result |
|--------|-------------------|------------------------|--------------|-----------------------------|--------------------|------------|
| ON001  | 05/07/2012        | 28/06/2012             | Yes          | No                          | Yes                | Positive   |
| ON002  | 14/06/2012        | 09/06/2012             | Yes          | NA                          | NA                 | Negative   |
| ON003  | 13/06/2013        | 08/06/2013             | No           | No                          | Yes                | Negative   |
| ON004  | 10/05/2012        | 07/05/2012             | No           | No                          | Yes                | Negative   |
| ON005  | 29/05/2012        | 19/05/2012             | Yes          | No                          | Yes                | Negative   |
| ON006  | 06/07/2012        | 03/07/2012             | Yes          | No                          | Yes                | Negative   |
| ON007  | 29/05/2012        | 19/05/2012             | Yes          | No                          | No                 | Negative   |
| ON008  | 09/08/2012        | 04/08/2012             | Yes          | No                          | Yes                | Negative   |
| ON009  | 31/07/2012        | 26/07/2012             | No           | No                          | Yes                | Negative   |
| ON010  | 13/04/2012        | 04/04/2012             | No           | No                          | Yes                | Negative   |
| ON011  | 30/03/2012        | 19/03/2012             | No           | No                          | Yes                | Negative   |
| ON012  | 03/02/2012        | 27/01/2012             | No           | No                          | Yes                | Negative   |
| ON013  | 22/03/2012        | 15/03/2012             | No           | No                          | Yes                | Negative   |
| ON014  | 07/03/2012        | 23/02/2012             | Yes          | No                          | Yes                | Negative   |
| ON015  | 25/09/2012        | 18/09/2012             | Yes          | No                          | Yes                | Negative   |
| ON016  | 07/11/2012        | 01/11/2012             | Yes          | No                          | Yes                | Negative   |
| ON017  | 16/11/2012        | 11/11/2012             | Yes          | No                          | No                 | Positive   |
| ON018  | 20/09/2012        | 16/09/2012             | Yes          | No                          | Yes                | Positive   |
| ON019  | 14/02/2013        | 07/02/2013             | Yes          | No                          | Yes                | Positive   |
| ON020  | 27/11/2012        | 16/11/2012             | Yes          | No                          | Yes                | Negative   |
| ON021  | 12/08/2013        | 29/07/2013             | Yes          | No                          | No                 | Negative   |
| ON022  | 17/01/2013        | 09/01/2013             | No           | No                          | Yes                | Negative   |
| ON023  | 09/01/2013        | 31/12/2012             | Yes          | No                          | No                 | Positive   |
| ON024  | 06/12/2012        | 26/11/2012             | Yes          | No                          | No                 | Negative   |
| ON025  | 15/01/2013        | 08/01/2013             | Yes          | No                          | Yes                | Negative   |
| ON026  | 11/04/2013        | 05/04/2013             | Yes          | No                          | No                 | Negative   |
| ON027  | 12/03/2013        | 28/02/2013             | Yes          | No                          | Yes                | Negative   |
| ON028  | 10/04/2013        | 29/03/2013             | Yes          | No                          | Yes                | Negative   |
| ON029  | 31/01/2014        | 20/01/2014             | Yes          | No                          | Yes                | Negative   |
| ON030  | 15/11/2013        | 06/11/2013             | Yes          | No                          | Yes                | Positive   |
| ON031  | 07/04/2014        | 25/03/2014             | Yes          | No                          | Yes                | Negative   |

|       |            |            |     |    |     |          |
|-------|------------|------------|-----|----|-----|----------|
| ON032 | 26/02/2014 | 18/02/2014 | Yes | No | Yes | Positive |
| ON033 | 29/01/2014 | 24/01/2014 | No  | No | No  | Negative |
| ON034 | 16/05/2014 | 07/05/2014 | Yes | No | Yes | Negative |
| ON035 | 18/07/2013 | 16/07/2013 | No  | No | Yes | Negative |
| ON036 | 15/05/2013 | 05/05/2013 | Yes | No | Yes | Negative |
| ON037 | 31/08/2012 | 22/08/2012 | Yes | No | Yes | Negative |
| ON038 | 30/04/2013 | 25/04/2013 | Yes | No | Yes | Negative |
| ON039 | 07/12/2012 | 23/11/2012 | Yes | No | Yes | Negative |
| ON040 | 21/12/2012 | 14/12/2012 | No  | No | No  | Positive |
| ON041 | 30/04/2013 | 25/04/2013 | Yes | No | Yes | Negative |
| ON042 | 17/04/2013 | 14/04/2013 | Yes | No | Yes | Negative |
| ON043 | 06/05/2014 | 28/04/2014 | Yes | No | Yes | Positive |
| ON044 | 22/01/2014 | 15/01/2014 | Yes | No | No  | Negative |

**Table S4.** Clinical and demographic features of patients and control used in this study. Sera that were reactive with PA83 have been excluded.

|                  | CDMS<br>sera | CDMS<br>sera<br>reactive<br>with<br>epsilon<br>toxin | CIS & ON<br>sera | CIS/ON<br>sera<br>reactive<br>with<br>epsilon<br>toxin | control<br>sera | Control<br>sera<br>reactive<br>with<br>epsilon<br>toxin |
|------------------|--------------|------------------------------------------------------|------------------|--------------------------------------------------------|-----------------|---------------------------------------------------------|
| N                | 61           | 14                                                   | 64               | 16                                                     | 125             | 13                                                      |
| Gender<br>M/F    | 15/46        | 3/11                                                 | 17/47            | 2/14                                                   | 33/92           | 6/7                                                     |
| Year of<br>Birth |              |                                                      |                  |                                                        |                 |                                                         |
| 1941 -<br>1950   | 7            | 2                                                    | 1                | 1                                                      | 8               | 0                                                       |
| 1951 -<br>1960   | 14           | 2                                                    | 4                | 1                                                      | 16              | 0                                                       |
| 1961 -<br>1970   | 19           | 3                                                    | 10               | 2                                                      | 31              | 6                                                       |
| 1971 -<br>1980   | 12           | 3                                                    | 16               | 3                                                      | 28              | 1                                                       |
| 1981 -<br>1990   | 7            | 2                                                    | 28               | 6                                                      | 37              | 5                                                       |
| 1991 -<br>2000   | 2            | 2                                                    | 5                | 3                                                      | 6               | 1                                                       |

**Table S5.** Peptides recognised by sera using Pepscan, with s/n  $\geq$  2.0.

| Group                                                     | Serum identification | Peptides recognised <sup>a</sup>                                                                                                                                              |
|-----------------------------------------------------------|----------------------|-------------------------------------------------------------------------------------------------------------------------------------------------------------------------------|
| Peptides recognised by rabbit sera against epsilon toxoid | Y43A-Y209A           | 49YDNDVDTLIE57, 68LKRMEKYYPN77, 82FDKVTINPQ90, 98NNPKVELDGEP107, 113EDVYVGKAL121, 196VPSQDILVPAN206, 249YKFSLSDTVN258, 261DLNEDGTININ271, 280MGDELIVKVRNL291, 298EYVIPVDKK306 |
| Sera from CDMS patients, positive by Western blotting     | BLT00143             | 170TGVSLTTSY178                                                                                                                                                               |
|                                                           | BLT00139             | 152TVGTSIQATAKFT165, 177SYSFANTNTN186                                                                                                                                         |
|                                                           | 309                  | 60RYNTKYNYLKR70, 213AYLKKVNVKGN223, 306KEKSNDNIVKYRS319                                                                                                                       |
| Sera from MS patients, negative by Western blotting       | BUH00147             | 175TTSYSFANTNT185                                                                                                                                                             |
|                                                           | BUH00135             | 285IVKVRNLNTNNVQEYVI301                                                                                                                                                       |
|                                                           | 315                  | 60RYNTKYNYLKR70, 213AYLKKVNVKGN223, 306KEKSNDNIVKYRS319, 165VPFNETGVSLTTS177                                                                                                  |
|                                                           | 318                  | 60RYNTKYNYLKR70, 213AYLKKVNVKGN223, 306KEKSNDNIVKYRS319                                                                                                                       |
|                                                           | BUH00144             | 60RYNTKYNYLKR70, 213AYLKKVNVKGN223, 306KEKSNDNIVKYRS319, 128QEQKLKSQSFTCKN141                                                                                                 |
|                                                           | 300                  | 185TNTNSKEITHNV196                                                                                                                                                            |
|                                                           | BUH00145             | 179SFANTTNTNSKEI192                                                                                                                                                           |
|                                                           | BUH00148             | 56IEKGRYNTKYNYLKR70, 201ILVPANTTVEVI212, 214YLKKVNVKGNVK225, 314IVKYRSLYIKAPGIK328                                                                                            |
|                                                           | 316                  | 175TTSYSFANTNT185                                                                                                                                                             |
|                                                           | BUH00137             | 299YVIPVDKKEK308                                                                                                                                                              |
|                                                           | BLT00133             | 60RYNTKYNYLKR70, 213AYLKKVNVKGN223, 306KEKSNDNIVKYRS319, 128QEQKLKSQSFTCKN141                                                                                                 |
| Sera from controls, positive by Western blotting          | BUH00226             | 90QGNDFYINNP100, 186NTNSKEITHNV196, 288VRNLNTNNVQEYV300, 294NNVQEYVIPVDKKE307                                                                                                 |
| Sera from controls, negative by Western blotting          | A7                   | 180FANTTNT187, 189SKEITHNVPSQDIL202                                                                                                                                           |
|                                                           | C6                   | 38TVSNEMSKASY49, 59GRYNTKYNYLK69, 213AYLKKVNVKGNVK225                                                                                                                         |
|                                                           | A8                   | 220VKGNVCLVG228                                                                                                                                                               |

|  |    |                                                                     |
|--|----|---------------------------------------------------------------------|
|  | D8 | 35ISNTVSNEMSKKA47,<br>61YNTKYNLYLKRMEKY74,<br>288VRNLNTNNVQEYVIP302 |
|--|----|---------------------------------------------------------------------|

<sup>a</sup> Numbering indicates position in the amino acid sequence of epsilon toxin
